# Supplementary material for: A highly-connected metal–organic framework based on [Co2(μ2-OH2)] units and mononuclear Co centers with high gas uptake capacity
Source: Royal Society of Chemistry journal article supplement (doi:10.1039/c3ce42361a), 2014-01-01
Supplement: c3ce42361a1.pdf [file c3ce42361a1.pdf]

Supporting information

## A Highly-connected Metal-Organic Framework based on [Co<sub>2</sub>(μ<sub>2</sub>-OH<sub>2</sub>)] units and mononuclear Co centers with high gas uptake capacity

Yao Kang, Fei Wang \*

State Key Laboratory of Structural Chemistry, Fujian Institute of Research on the Structure of Matter, the Chinese Academy of Sciences, Fuzhou, Fujian 350002, P. R. China.

E-mail: [wangfei04@fjirsm.ac.cn](mailto:wangfei04@fjirsm.ac.cn)

Table s1. The selected bond lengths (Å) and angles (°) for **1**.

|                     |            |                     |           |
|---------------------|------------|---------------------|-----------|
| Co(1)-O(1)          | 2.111(8)   | Co(3)-O(8)          | 2.056(7)  |
| Co(1)-O(1)#1        | 2.111(8)   | Co(3)-O(8)#2        | 2.056(7)  |
| Co(1)-N(2)#1        | 2.189(8)   | Co(3)-O(12)         | 2.079(11) |
| Co(1)-N(2)#2        | 2.189(8)   | Co(3)-O(11)         | 2.113(8)  |
| Co(1)-N(2)          | 2.189(8)   | Co(3)-N(5)          | 2.130(9)  |
| Co(1)-N(2)#3        | 2.189(8)   | Co(3)-N(5)#2        | 2.130(9)  |
| Co(2)-O(7)          | 2.028(8)   | Co(4)-O(3)          | 2.068(7)  |
| Co(2)-O(7)#2        | 2.028(8)   | Co(4)-O(4)#6        | 2.077(6)  |
| Co(2)-O(6)#4        | 2.088(8)   | Co(4)-O(10)#7       | 2.077(7)  |
| Co(2)-O(6)#5        | 2.088(8)   | Co(4)-N(3)          | 2.155(8)  |
| Co(2)-N(1)          | 2.148(11)  | Co(4)-O(13)         | 2.155(6)  |
| Co(2)-O(11)         | 2.219(8)   | Co(4)-N(4)#2        | 2.158(7)  |
| O(1)-Co(1)-O(1)#1   | 180.00(12) | O(8)-Co(3)-O(8)#2   | 91.0(5)   |
| O(1)-Co(1)-N(2)#1   | 94.3(3)    | O(8)-Co(3)-O(12)    | 85.3(3)   |
| O(1)#1-Co(1)-N(2)#1 | 85.7(3)    | O(8)#2-Co(3)-O(12)  | 85.3(3)   |
| O(1)-Co(1)-N(2)#2   | 85.7(3)    | O(8)-Co(3)-O(11)    | 95.3(3)   |
| O(1)#1-Co(1)-N(2)#2 | 94.3(3)    | O(8)#2-Co(3)-O(11)  | 95.3(3)   |
| N(2)#1-Co(1)-N(2)#2 | 87.8(4)    | O(12)-Co(3)-O(11)   | 179.1(4)  |
| O(1)-Co(1)-N(2)     | 85.7(3)    | O(8)-Co(3)-N(5)     | 88.9(4)   |
| O(1)#1-Co(1)-N(2)   | 94.3(3)    | O(8)#2-Co(3)-N(5)   | 175.6(3)  |
| N(2)#1-Co(1)-N(2)   | 180.000(1) | O(12)-Co(3)-N(5)    | 90.3(4)   |
| N(2)#2-Co(1)-N(2)   | 92.2(4)    | O(11)-Co(3)-N(5)    | 89.0(3)   |
| O(1)-Co(1)-N(2)#3   | 94.3(3)    | O(8)-Co(3)-N(5)#2   | 175.6(3)  |
| O(1)#1-Co(1)-N(2)#3 | 85.7(3)    | O(8)#2-Co(3)-N(5)#2 | 88.9(4)   |
| N(2)#1-Co(1)-N(2)#3 | 92.2(4)    | O(12)-Co(3)-N(5)#2  | 90.3(4)   |
| N(2)#2-Co(1)-N(2)#3 | 180.0(3)   | O(11)-Co(3)-N(5)#2  | 89.0(3)   |
| N(2)-Co(1)-N(2)#3   | 87.8(4)    | N(5)-Co(3)-N(5)#2   | 90.8(6)   |
| O(7)-Co(2)-O(7)#2   | 94.1(5)    | O(3)-Co(4)-O(4)#6   | 93.5(3)   |
| O(7)-Co(2)-O(6)#4   | 88.6(4)    | O(3)-Co(4)-O(10)#7  | 175.3(3)  |

|                     |          |                      |          |
|---------------------|----------|----------------------|----------|
| O(7)#2-Co(2)-O(6)#4 | 176.8(3) | O(4)#6-Co(4)-O(10)#7 | 91.1(3)  |
| O(7)-Co(2)-O(6)#5   | 176.8(3) | O(3)-Co(4)-N(3)      | 87.7(3)  |
| O(7)#2-Co(2)-O(6)#5 | 88.6(4)  | O(4)#6-Co(4)-N(3)    | 176.3(3) |
| O(6)#4-Co(2)-O(6)#5 | 88.6(5)  | O(10)#7-Co(4)-N(3)   | 87.6(3)  |
| O(7)-Co(2)-N(1)     | 86.3(3)  | O(3)-Co(4)-O(13)     | 89.3(2)  |
| O(7)#2-Co(2)-N(1)   | 86.3(3)  | O(4)#6-Co(4)-O(13)   | 92.4(2)  |
| O(6)#4-Co(2)-N(1)   | 92.1(3)  | O(10)#7-Co(4)-O(13)  | 90.3(3)  |
| O(6)#5-Co(2)-N(1)   | 92.1(3)  | N(3)-Co(4)-O(13)     | 91.2(3)  |
| O(7)-Co(2)-O(11)    | 90.7(2)  | O(3)-Co(4)-N(4)#2    | 89.9(3)  |
| O(7)#2-Co(2)-O(11)  | 90.7(2)  | O(4)#6-Co(4)-N(4)#2  | 86.8(3)  |
| O(6)#4-Co(2)-O(11)  | 91.1(3)  | O(10)#7-Co(4)-N(4)#2 | 90.6(3)  |
| O(6)#5-Co(2)-O(11)  | 91.1(3)  | N(3)-Co(4)-N(4)#2    | 89.7(3)  |
| N(1)-Co(2)-O(11)    | 175.6(4) | O(13)-Co(4)-N(4)#2   | 178.8(3) |

Symmetry transformations used to generate equivalent atoms: #1 -x, -y, -z+2; #2 x, -y, z; #3 -x, y, -z+2; #4 -x+1/2, y+1/2, -z+2; #5 -x+1/2, -y-1/2, -z+2; #6 -x, y, -z+1; #7 -x+1/2, y-1/2, -z+1.

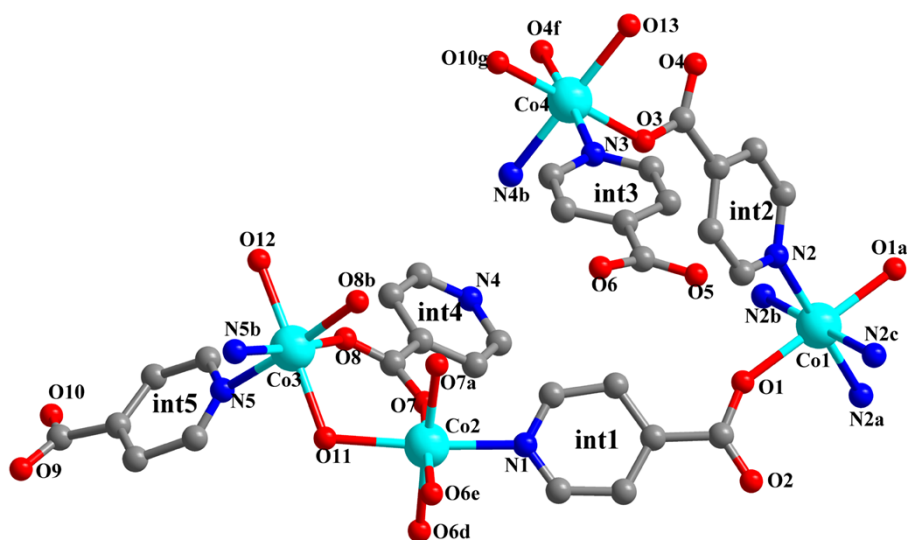

Fig.s1 View of an asymmetric unit of **1** (Symmetry transformations used to generate equivalent atoms: (a)  $-x, -y, -z+2$ ; (b)  $x, -y, z$ ; (c)  $-x, y, -z+2$ ; (d)  $-x+1/2, y+1/2, -z+2$ ; (e)  $-x+1/2, -y-1/2, -z+2$ ; (f)  $-x, y, -z+1$ ; (g)  $-x+1/2, y-1/2, -z+1$ ).

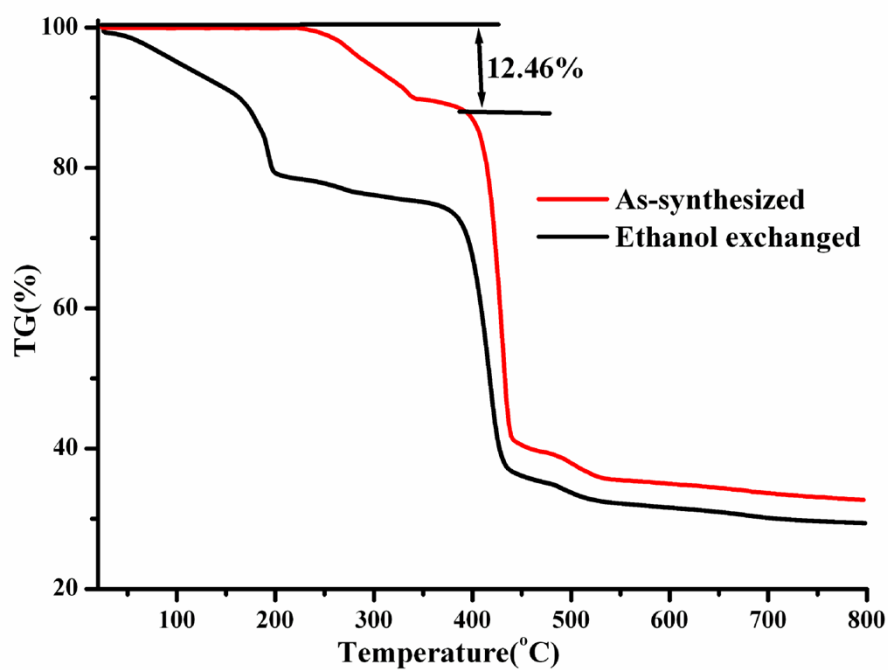

Fig.s2 the TG plots of **1**.

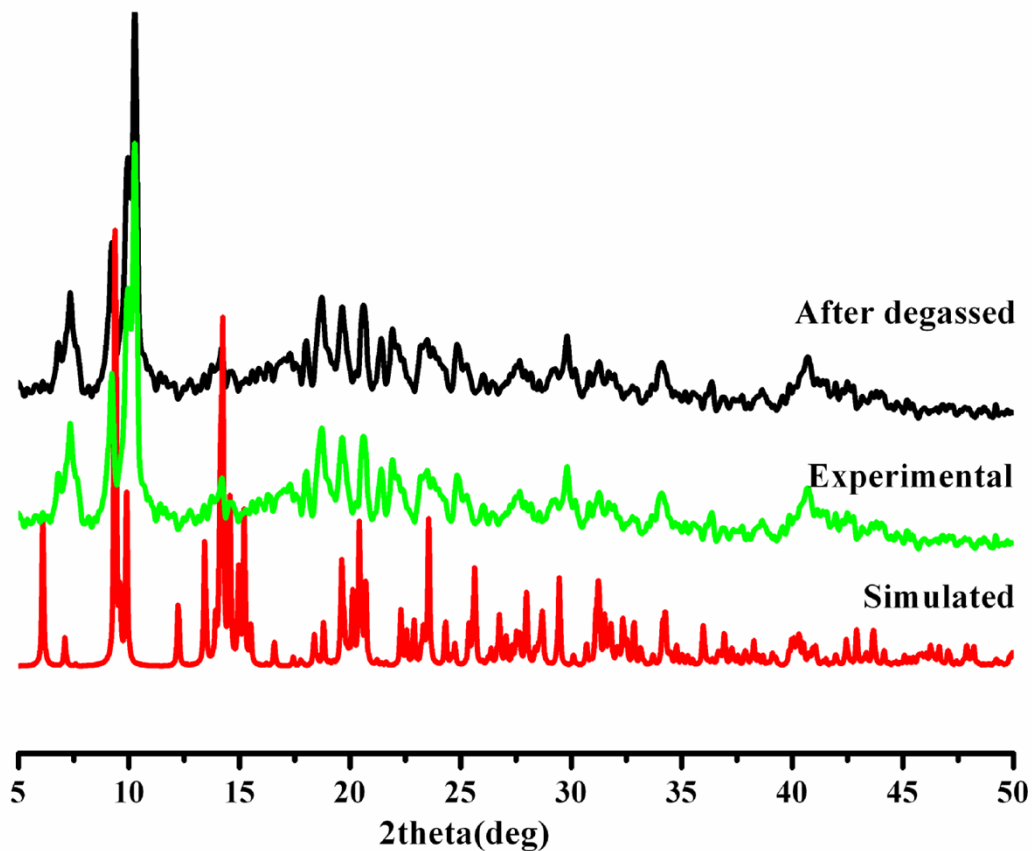

Fig.s3 the powder XRD (PXRD) patterns of 1 at different conditions.

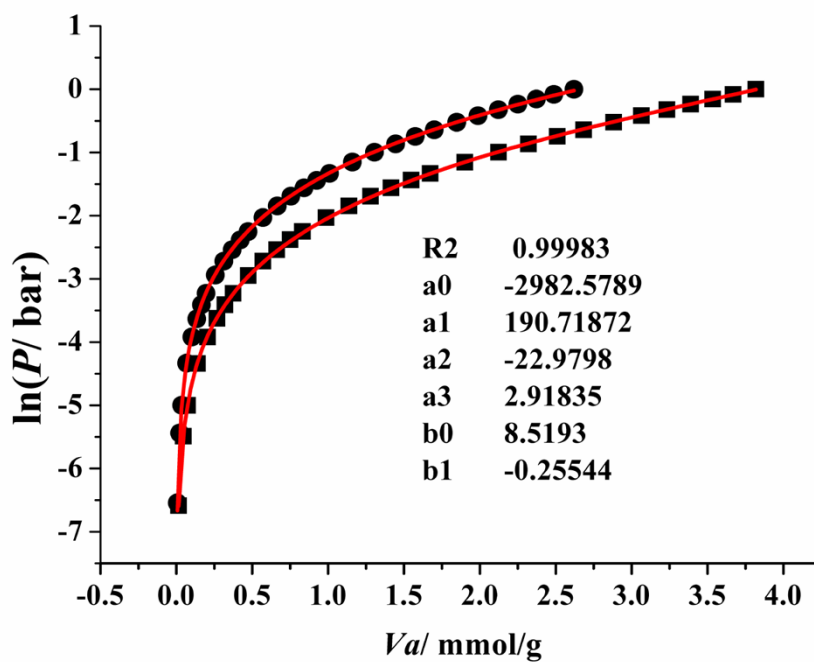

Figure S4. Virial analysis of the CO<sub>2</sub> sorption data for 1a.

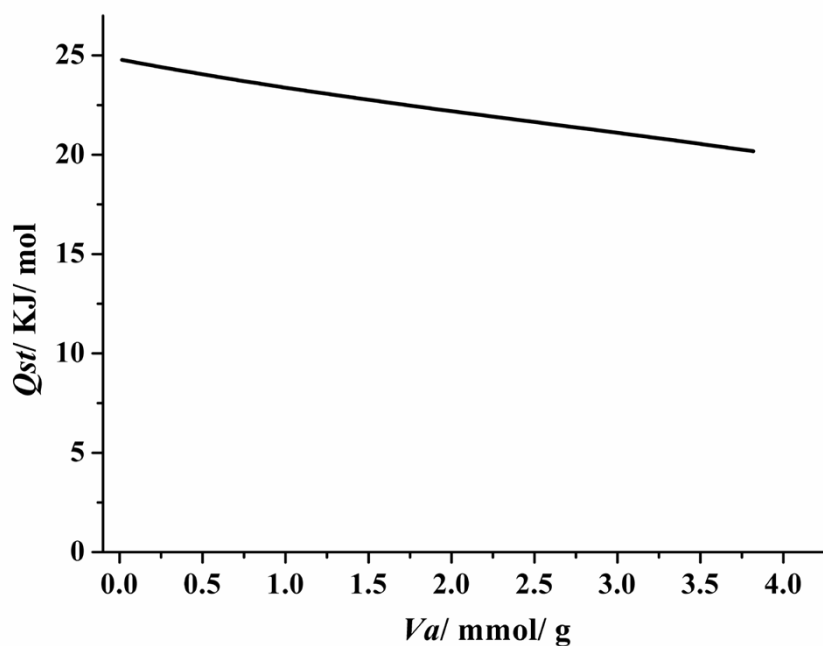

Figure S5. Heat of CO<sub>2</sub> adsorption for **1a** estimated by the virial equation.

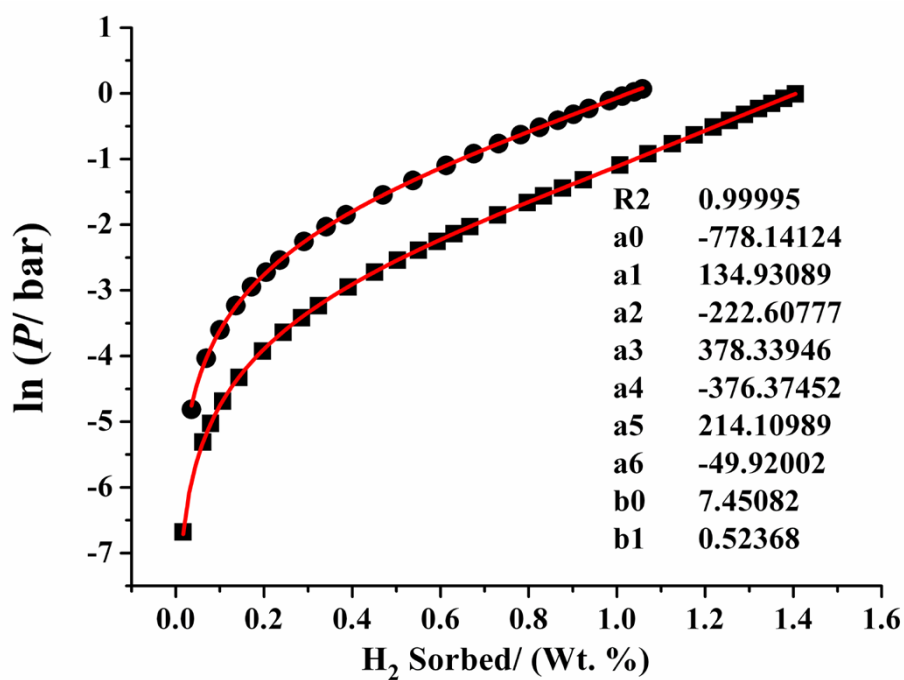

Figure S6. Virial analysis of the H<sub>2</sub> sorption data for **1a**.

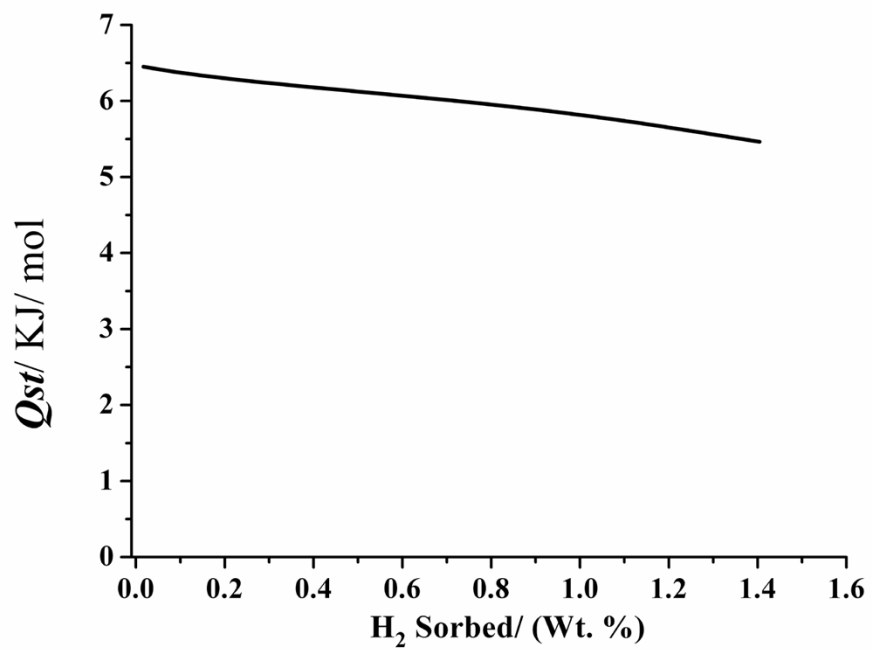

Figure S7. Heat of H<sub>2</sub> adsorption for **1a** estimated by the virial equation.
